# Supplementary material for: Monitoring of pH Using an i-Motif-Forming Sequence Containing a Fluorescent Cytosine Analogue, tC
Source: PubMed Central journal article supplement (PMC6429216; doi:10.3390/molecules24050952), 2019-03-08
Supplement: molecules-24-00952-s001.pdf [file molecules-24-00952-s001.pdf]

# Monitoring of pH using i-motif forming sequence containing fluorescent cytosine analogue, tC

Patrycja Bielecka<sup>1,\*</sup>, Anna Dembska<sup>1</sup> and Bernard Juskowiak<sup>1</sup>

1. Faculty of Chemistry, Adam Mickiewicz University, Umultowska 89b, 61-614 Poznan, Poland.;

\* Correspondence: [bieleckapat@gmail.com](mailto:bieleckapat@gmail.com); Tel.: 48-61829-1771

## Supplementary Materials

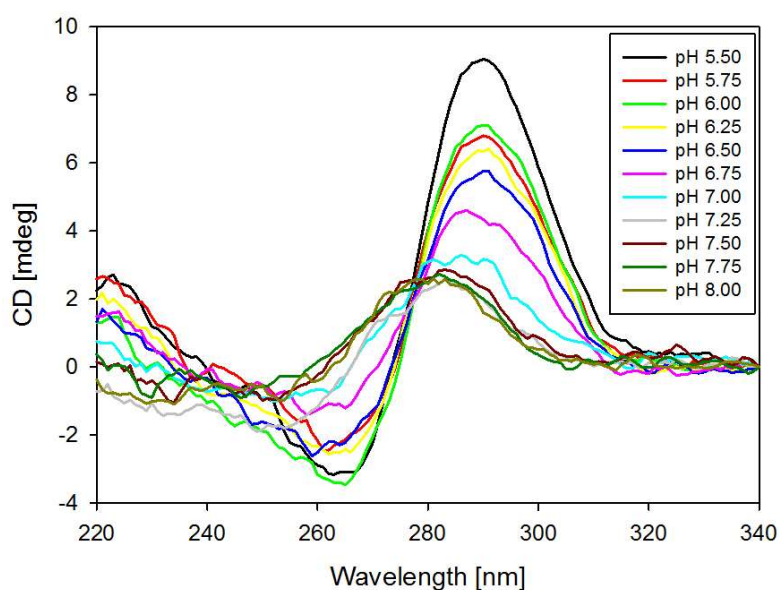

**Figure S1.** CD spectra of RET20 sequences in the pH range of 5.50–8.00.

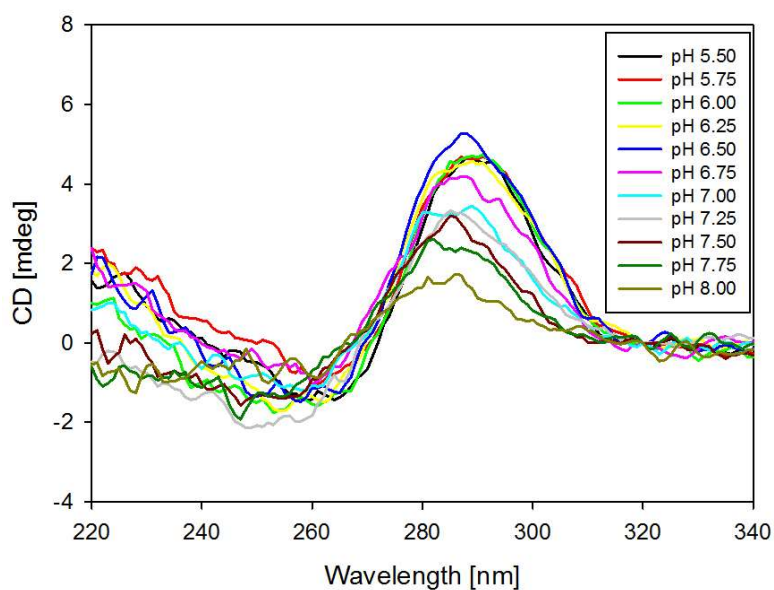

**Figure S2.** CD spectra of 8tC probe in the pH range of 5.50–8.00.

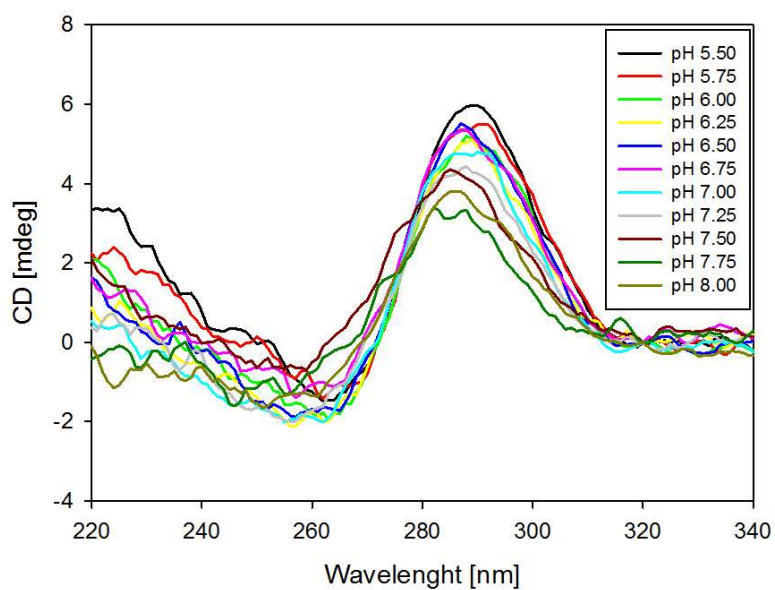

**Figure S3.** CD spectra of 14tC probe in the pH range of 5.50–8.00.

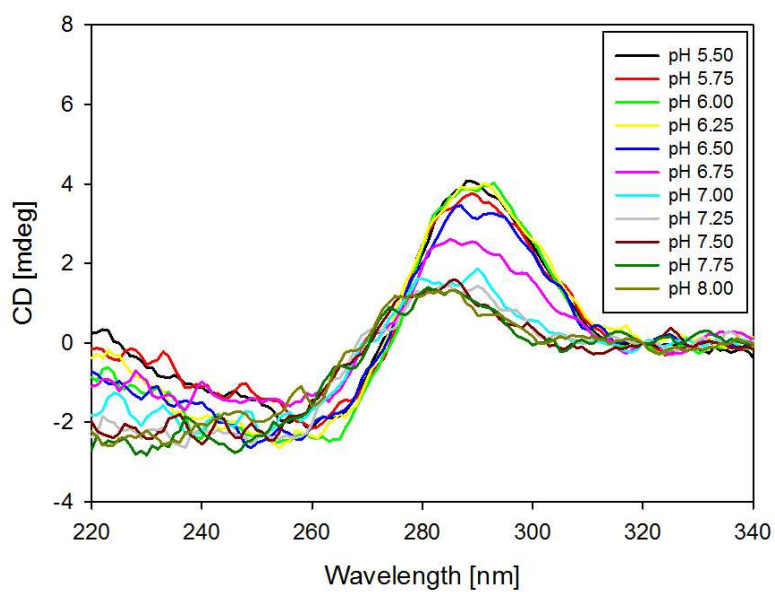

**Figure S4.** CD spectra of 19tC probe in the pH range of 5.50–8.00.

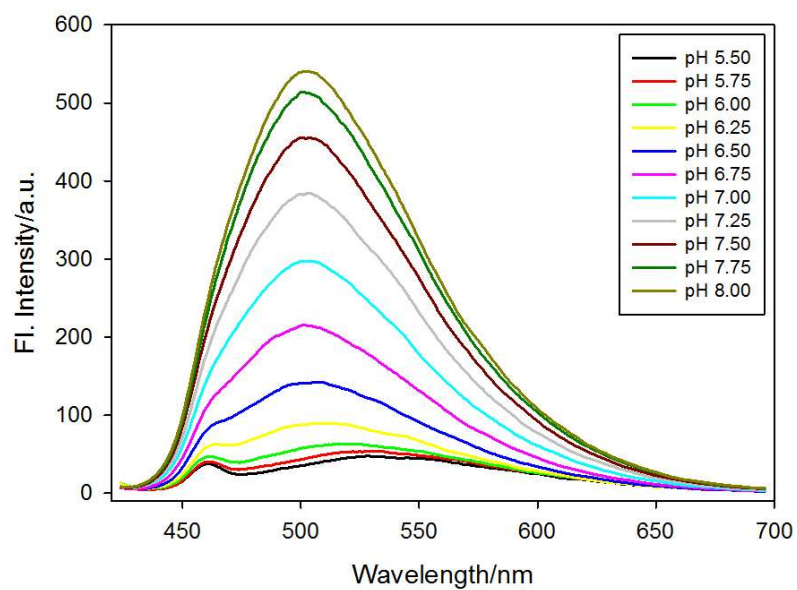

**Figure S5.** The emission spectra of 14tC probe at the pH range from 5.50 to 8.00.

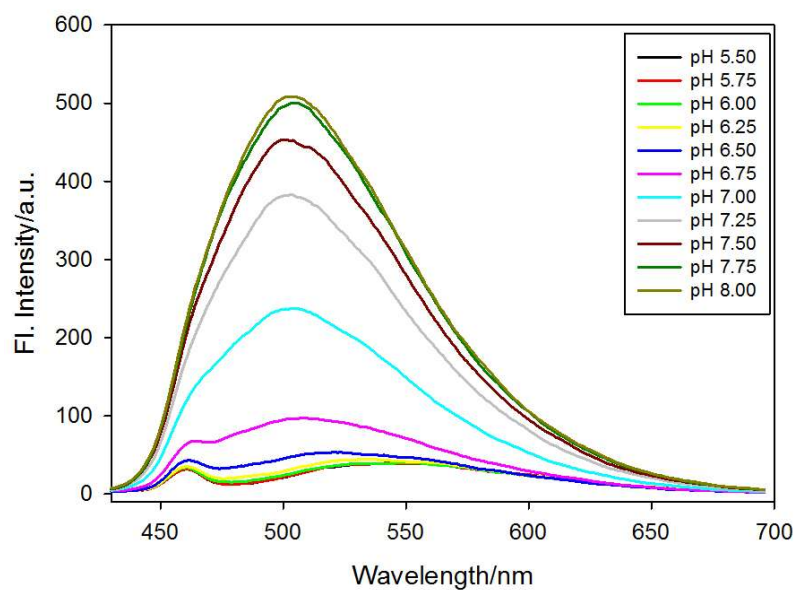

**Figure S6.** The emission spectra of 17tC probe at the pH range from 5.50 to 8.00.

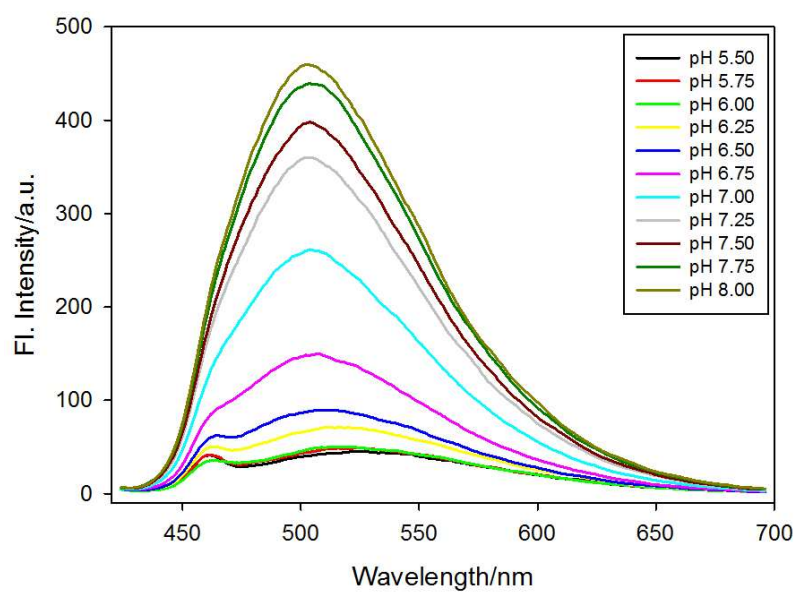

**Figure S7.** The emission spectra of 19tC probe at the pH range from 5.50 to 8.00.
